# Supplementary material for: Histopathological Features of Symptomatic and Asymptomatic Honeybees Naturally Infected by Deformed Wing Virus
Source: MDPI journal article supplement (doi:10.3390/pathogens10070874), 2021-07-10
Supplement: s1 [file s1]

| Primers 5'→ 3'                                                                        | Product size (bp) | Annealing T° | Application   |
|---------------------------------------------------------------------------------------|-------------------|--------------|---------------|
| DWV-F (5- GGATGTTATCTCCTGCGTGGAA -3) *<br>DWV-R (5-CCTCATTAACGTGTGTCGTTGATAATTG -3) * | 69                | 60           | PCR/qPCR      |
| Actβ -F (5- ATGCCAACACTGTCCTTCTGG -3) **<br>Actβ -R (5- GACCCACCAATCCATACGGA -3) **   | 152               | 60           | PCR/qPCR      |
| DWV-A-F (5- GCGTGTTGCAACTCGCTTC-3)***<br>DWV-A-R (5-TGCCTGCACCGGATTCGATAAT-3)***      | 211               | 58           | PCR           |
| DWV-B-F (5-GCAAGTTGGAGATAATTGTA-3)****<br>DWV-B-R ( 5-CGATACTTACATTCTTCAAGAT-3)****   | 116               | 58           | PCR           |
| IAPV-F (5-CGAACTTGGTGAAG-3)*****<br>IAPV-R (5-GCATCAGTCGTCTTCCAGG-3)*****             | 110               | 58           | Multiplex PCR |
| SBV-F (5-CGTAATTGCGGAGTGGAAAGATT-3)*****<br>SBV-R (5-AGATTCCTTCGAGGGTACCTCATC-3)***** | 342               | 58           | Multiplex PCR |
| AIV-F (5-GGTGCCCTATTTAGGGTGAGGA-3)*****<br>ABPV-R (5-ACTACAGAAGGCAATGTCCAAGA-3)*****  | 460               | 58           | Multiplex PCR |
| BQCV-F (5-CTTTATCGAGGAGGAGTTGAGT-3)*****<br>BQCV-R (5-GCAATAGATAAAGTGAGCCCTCC-3)***** | 536               | 58           | Multiplex PCR |
| AIV-F (5-GGTGCCCTATTTAGGGTGAGGA-3)*****<br>KBV-R (5-TGCACGGGAAGTATAAATAATTCT-3)*****  | 641               | 58           | Multiplex PCR |
| CBPV-F (5-AACCTGCCTCAACACAGGCAAC-3)*****<br>CBPV-R (5-ACATCTCTTCTTCGGTGTGAGCC-3)***** | 774               | 58           | Multiplex PCR |

Oligonucleotids used for amplification of viruses and Act β in this study. Sequences, products size, annealing temperature and applications are indicated.

F:Forward; R: Reverse; DWV:Deformed Wing Virus; Actβ:Actin β; DWV-A:Deformed Wing Virus-A variant; DWV-B:Deformed Wing Virus-B variant; IAPV:Israeli Acute Paralysis Virus; SBV:Sacbrood Virus; AIV:Apis Iridescent Virus; ABPV:Acute Bee Paralysis Virus; BQCV:Black Queen Cell Virus; KBV: Kashmir Bee Virus; CBPV:Chronic Bee Paralysis Virus

\*70,\*71,\*\*64,\*\*\*65,\*\*\*\*72,\*\*\*\*\*73,\*\*\*\*\*74
